# Supplementary material for: Distribution of atrial cardiomyopathy markers and association with atrial fibrillation detected after ischaemic stroke in the SAFAS study
Source: HighWire-hosted journal article supplement (doi:10.1136/svn-2023-002447), 2023-07-10
Supplement: svn-2023-002447supp001_data_supplement.pdf [file svn-2023-002447supp001_data_supplement.pdf]

## Supplementary data

Figure 1:

Distribution of the criteria for atrial cardiomyopathy (AC) according to ARCADIA definition in the excluded patients of the SAFAS cohort. 17 patients had at least 1 AC criteria (41%), and these were distributed as shown in the figure below. Abbreviations: NT-proBNP: N-Terminal pro-B-type natriuretic peptide. PTFV1: P-wave terminal force in lead V1. LADI: left atrial diameter index.

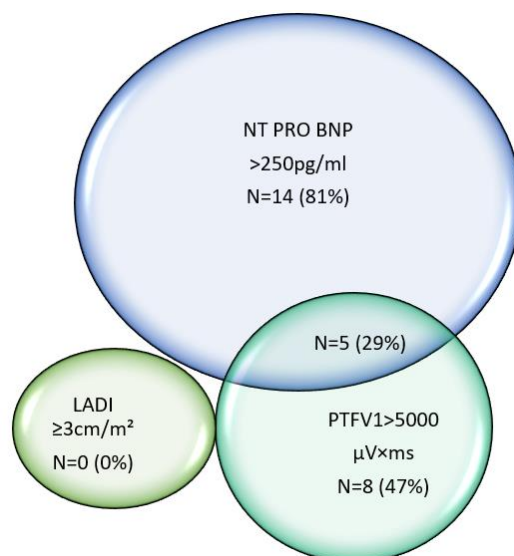

Figure 2:

Distribution of the criteria for atrial cardiomyopathy (AC) according to ARCADIA definition in the cryptogenic strokes of the SAFAS cohort. Abbreviations: NT-proBNP: N-Terminal pro-B-type natriuretic peptide. PTFV1: P-wave terminal force in lead V1. LADI: left atrial diameter index.

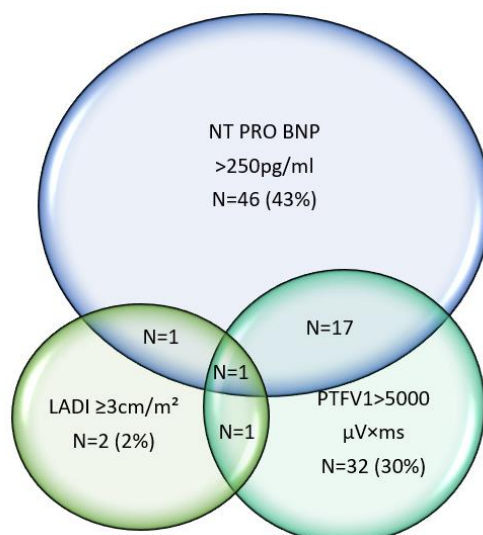

Table 1 :

| Clinical characteristics of the excluded patients compared to the included population (n (%), mean $\pm$ SD or median (IQR))                                                                                                                                                        |                             |                            |              |
|-------------------------------------------------------------------------------------------------------------------------------------------------------------------------------------------------------------------------------------------------------------------------------------|-----------------------------|----------------------------|--------------|
|                                                                                                                                                                                                                                                                                     | Included population (n=183) | Excluded population (n=41) | p            |
| <b>Risk factors</b>                                                                                                                                                                                                                                                                 |                             |                            |              |
| Age, years                                                                                                                                                                                                                                                                          | 69.7 (58.2-78.9)            | 69.3 (59.2-77.9)           | 0.887        |
| Female sex                                                                                                                                                                                                                                                                          | 80 (43.7)                   | 22 (53.7)                  | 0.248        |
| Obesity (BMI>30kg/m <sup>2</sup> )                                                                                                                                                                                                                                                  | 37 (20.2)                   | 11 (26.8)                  | 0.351        |
| High blood pressure                                                                                                                                                                                                                                                                 | 103 (56.3)                  | 21 (51.2)                  | 0.555        |
| Hypercholesterolemia                                                                                                                                                                                                                                                                | 56 (30.6)                   | 10 (24.4)                  | 0.430        |
| Diabetes                                                                                                                                                                                                                                                                            | 37 (20.2)                   | 6 (14.6)                   | 0.412        |
| Active smoking                                                                                                                                                                                                                                                                      | 40 (21.9)                   | 7 (17.1)                   | 0.496        |
| Obstructive sleep apnea                                                                                                                                                                                                                                                             | 17 (9.3)                    | 4 (9.8)                    | 0.926        |
| <b>Cardiovascular history</b>                                                                                                                                                                                                                                                       |                             |                            |              |
| Heart failure                                                                                                                                                                                                                                                                       | 5 (2.7)                     | 3 (7.3)                    | 0.164        |
| Coronary artery disease                                                                                                                                                                                                                                                             | 14 (7.7)                    | 5 (12.2)                   | 0.345        |
| <b>Clinical data at admission</b>                                                                                                                                                                                                                                                   |                             |                            |              |
| CHA <sub>2</sub> DS <sub>2</sub> VASc score                                                                                                                                                                                                                                         | 3 (1-4)                     | 2 (1-4)                    | 0.622        |
| <b>Imaging data</b>                                                                                                                                                                                                                                                                 |                             |                            |              |
| MCA stroke                                                                                                                                                                                                                                                                          | 112 (61.2%)                 | 29 (70.7%)                 | 0.253        |
| Superficial MCA stroke                                                                                                                                                                                                                                                              | 86 (47%)                    | 28 (68.3%)                 | <b>0.014</b> |
| Deep MCA stroke                                                                                                                                                                                                                                                                     | 48 (26.2)                   | 12 (29.3)                  | 0.691        |
| <b>ECG data</b>                                                                                                                                                                                                                                                                     |                             |                            |              |
| P-wave duration downwards, ms                                                                                                                                                                                                                                                       | 40 (40-60)                  | 60 (40-60)                 | 0.813        |
| PTF $\geq$ 5mv.ms                                                                                                                                                                                                                                                                   | 48 (98)                     | 8 (100)                    | 0.684        |
| <b>Biologic data</b>                                                                                                                                                                                                                                                                |                             |                            |              |
| NT pro BNP, pg/ml                                                                                                                                                                                                                                                                   | 918.5 $\pm$ 826.5           | 856.3 $\pm$ 921.3          | 0.938        |
| <b>Echocardiographic data</b>                                                                                                                                                                                                                                                       |                             |                            |              |
| LAVI, ml/m <sup>2</sup>                                                                                                                                                                                                                                                             | 27.7 (20.9-36.1)            | 27.1 (19.4-33.5)           | 0.569        |
| LVEF, %                                                                                                                                                                                                                                                                             | 60 (55-66)                  | 60 (56-65)                 | 0.745        |
| Abbreviations: IQR: interquartile range; NT-pro-BNP: N-Terminal pro-B-type natriuretic peptide; MCA: middle cerebral artery; ECG: electrocardiogram; LAVI: left atrial volume indexed; LVEF: left ventricular ejection fraction, PTF: P-wave terminal force; SD: standard deviation |                             |                            |              |
